# Supplementary material for: A large-scale genomic approach affords unprecedented resolution for the molecular epidemiology and evolutionary history of contagious caprine pleuropneumonia
Source: PubMed Central journal article supplement (PMC4492101; doi:10.1186/s13567-015-0208-x), 2015-07-06

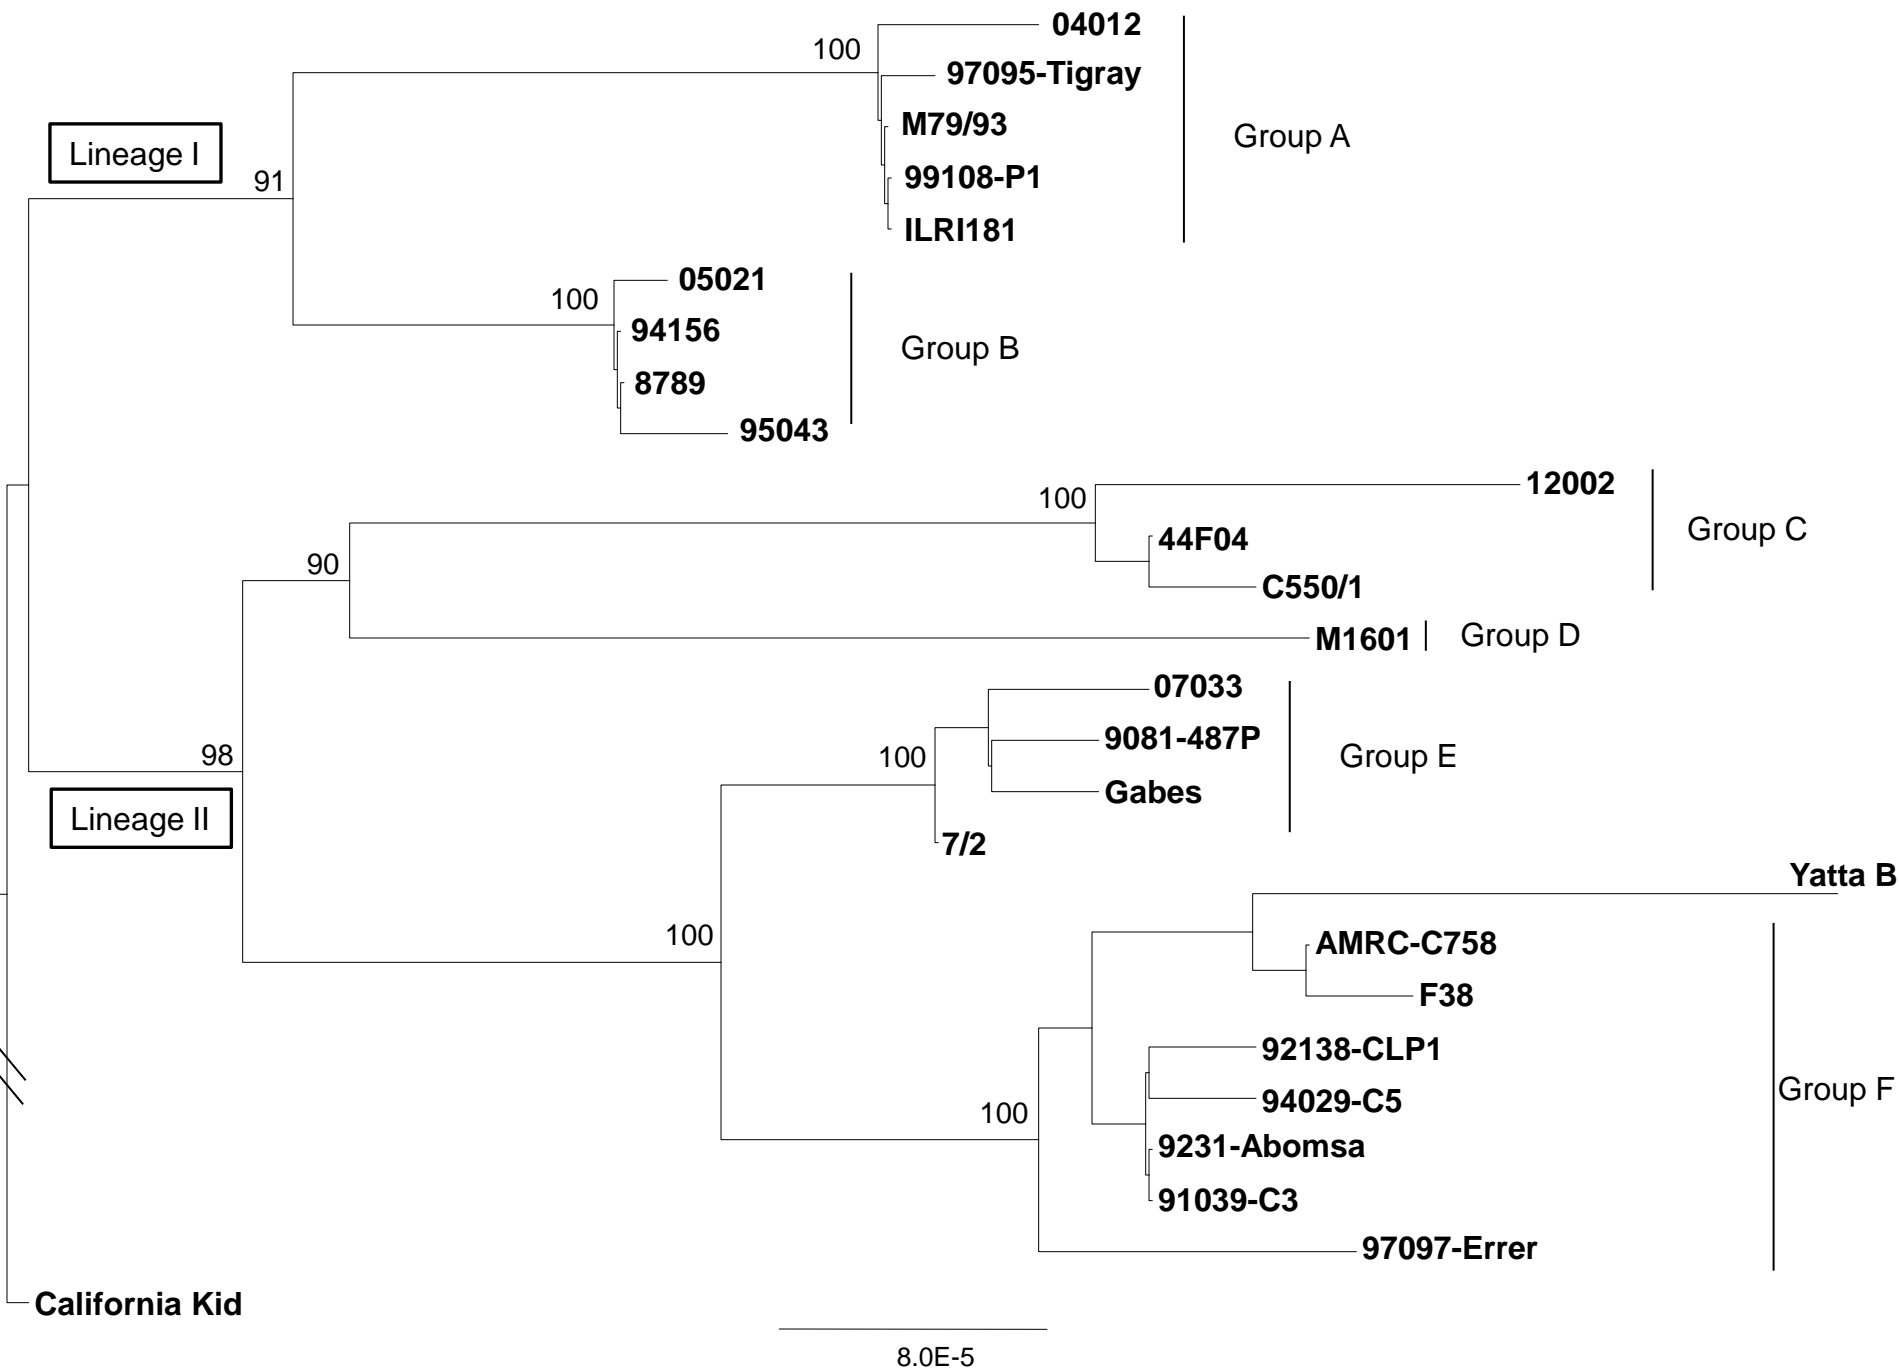

Supplement: 13567_2015_208_MOESM7_ESM.pdf [file 13567_2015_208_MOESM7_ESM.pdf]
