# Supplementary material for: A large-scale genomic approach affords unprecedented resolution for the molecular epidemiology and evolutionary history of contagious caprine pleuropneumonia
Source: Vet Res. 2015 Jul 6;46(1):74. doi: 10.1186/s13567-015-0208-x (PMC4492101; doi:10.1186/s13567-015-0208-x)
Supplement: Additional file 6: — List of polymorphic positions. Description of the polymorphic positions found in the genotyping dataset. [file 13567_2015_208_MOESM6_ESM.xlsx]

## Sheet: Base calling
Additional file 6: List of polymorphic positions in the genotyping dataset
Position in the alignment	Type	Reference Base*	Polymorphism*	Polymorphism %*	Feature Name
55	SNP	A	G	4.0 %	CDS: MCCP001_0008
256	SNP	G	A	8.0 %	CDS: MCCP001_0008
724	SNP	A	T	4.0 %	CDS: MCCP001_0008
1131	SNP	G	A	52.0 %	CDS: MCCP001_0008
1772	SNP	A	T	4.0 %	CDS: MCCP001_0008
1945	SNP	T	C	68.0 %	CDS: MCCP001_0008
1983	SNP	C	T	20.0 %	CDS: MCCP001_0008
2267	SNP	C	T	4.0 %	CDS: MCCP001_0024
2291	SNP	C	T	52.0 %	CDS: MCCP001_0024
2370	SNP	A	G	12.0 %	CDS: MCCP001_0024
2421	SNP	A	G	68.0 %	CDS: MCCP001_0024
2941	SNP	G	A	20.0 %	CDS: MCCP001_0041
4197	SNP	C	T	52.0 %	CDS: MCCP001_0041
5690	SNP	C	T	16.0 %	CDS: MCCP001_0042
6936	SNP	G	T	4.0 %	CDS: MCCP001-0043
7226	SNP	A	G	88.0 %	CDS: MCCP001-0043
7325	SNP	G	A	4.0 %	CDS: MCCP001-0043
7505	SNP	G	C	4.0 %	CDS: MCCP001-0043
7631	SNP	A	T	12.0 %	CDS: MCCP001-0043
7749	SNP	C	T	16.0 %	CDS: MCCP001-0043
8473	SNP	T	C	20.0 %	CDS: MCCP001_0044
8821	SNP	T	C	4.0 %	CDS: MCCP001_0044
9510	SNP	C	T	4.0 %	CDS: MCCP001_0046
9580	SNP	T	C	4.0 %	CDS: MCCP001_0046
10204	SNP	T	C	36.0 %	CDS: MCCP001_0046
10601	SNP	G	A	16.0 %	CDS: MCCP001_0046
10636	SNP	A	G	4.0 %	CDS: MCCP001_0046
11117	SNP	G	A	12.0 %	CDS: MCCP001_0046
12692	SNP	G	A	16.0 %	CDS: MCCP001_0088
12952	SNP	T	C	12.0 %	CDS: MCCP001_0088
13389	SNP	A	G	12.0 %	CDS: MCCP001_0088
14213	SNP	G	A	4.0 %	CDS: MCCP001_0088
14227	SNP	A	G	4.0 %	CDS: MCCP001_0088
14395	SNP	T	C	4.0 %	CDS: MCCP001_0088
14700	SNP	C	T	4.0 %	CDS: MCCP001_0088
15826	SNP	T	C	16.0 %	CDS: MCCP001_0089
17109	SNP	A	G	12.0 %	CDS: MCCP001_0089
17169	SNP	A	G	4.0 %	CDS: MCCP001_0089
17448	SNP	G	A	4.0 %	CDS: MCCP001_0089
17830	SNP	A	T	8.0 %	CDS: MCCP001_0089
18182	SNP	G	T	4.0 %	CDS: MCCP001_0089
18283	SNP	C	T	4.0 %	CDS: MCCP001_0089
18523	SNP	A	G	4.0 %	CDS: MCCP001_0089
18590	SNP	G	A	4.0 %	CDS: MCCP001_0089
19860	SNP	T	C	52.0 %	CDS: MCCP001_0099
20991	SNP	T	C	4.0 %	CDS: MCCP001_0103
21667	SNP	T	C	12.0 %	CDS: MCCP001_0103
21700	SNP	A	G	4.0 %	CDS: MCCP001_0103
21838	SNP	T	C	12.0 %	CDS: MCCP001_0103
22115	SNP	G	A	4.0 %	CDS: MCCP001_0103
22254	SNP	G	A	4.0 %	CDS: MCCP001_0103
22325	SNP	C	T	4.0 %	CDS: MCCP001_0103
22753	SNP	A	T	4.0 %	CDS: MCCP001_0120
23767	SNP	T	C	4.0 %	CDS: MCCP001_0120
23936	SNP	A	C	20.0 %	CDS: MCCP001_0120
24272	SNP	G	A	4.0 %	CDS: MCCP001_0120
24488	SNP	A	G	4.0 %	CDS: MCCP001_0120
24500	SNP	G	A	4.0 %	CDS: MCCP001_0120
25057	SNP	T	C	68.0 %	CDS: MCCP001_0124
25932	SNP	G	A	68.0 %	CDS: MCCP001_0124
26302	SNP	C	T	4.0 %	CDS: MCCP001_0124
26444	SNP	A	G	4.0 %	CDS: MCCP001_0124
26550	SNP	G	A	4.0 %	CDS: MCCP001_0124
26918	SNP	G	A	52.0 %	CDS: MCCP001_0124
27566	Indel	-	T	4.0 %	CDS: MCCP001_0135
27567	Indel	-	A	4.0 %	CDS: MCCP001_0135
27568	Indel	-	A	4.0 %	CDS: MCCP001_0135
27569	Indel	-	A	4.0 %	CDS: MCCP001_0135
27570	Indel	-	C	4.0 %	CDS: MCCP001_0135
27571	Indel	-	A	4.0 %	CDS: MCCP001_0135
27729	SNP	G	A	4.0 %	CDS: MCCP001_0135
27896	SNP	T	G	36.0 %	CDS: MCCP001_0150-MCCP001_0151-MCCP001_0152
28002	Homopolymer	A	-	0.72	CDS: MCCP001_0150-MCCP001_0151-MCCP001_0152
28142	SNP	G	A	36.0 %	CDS: MCCP001_0150-MCCP001_0151-MCCP001_0152
28204	SNP	G	T	4.0 %	CDS: MCCP001_0150-MCCP001_0151-MCCP001_0152
28304	SNP	G	T	68.0 %	CDS: MCCP001_0150-MCCP001_0151-MCCP001_0152
28319	SNP	T	C	4.0 %	CDS: MCCP001_0150-MCCP001_0151-MCCP001_0152
28544	SNP	T	C	12.0 %	CDS: MCCP001_0150-MCCP001_0151-MCCP001_0152
28638	SNP	A	G	4.0 %	CDS: MCCP001_0150-MCCP001_0151-MCCP001_0152
29683	SNP	G	A	4.0 %	CDS: MCCP001_0156
30921	SNP	G	A	4.0 %	CDS: MCCP001_0170
31142	SNP	T	C	20.0 %	CDS: MCCP001_0170
31514	SNP	T	A	4.0 %	CDS: MCCP001_0170
31785	SNP	T	G	36.0 %	CDS: MCCP001_0173
33092	SNP	T	C	4.0 %	CDS: MCCP001_0263
34366	SNP	A	G	4.0 %	CDS: MCCP001_0274
34623	SNP	A	G	36.0 %	CDS: MCCP001_0274
34763	SNP	A	G	36.0 %	CDS: MCCP001_0274
34879	Homopolymer	A	-	4.0 %	CDS: MCCP001_0274
35004	SNP	A	G	16.0 %	CDS: MCCP001_0274
35142	SNP	C	G	4.0 %	CDS: MCCP001_0274
35557	Indel	-	-	4.0 %	CDS: MCCP001_0273
35631	SNP	G	A	52.0 %	CDS: MCCP001_0273
35814	SNP	T	A	4.0 %	CDS: MCCP001_0273
35947	SNP	G	A	4.0 %	CDS: MCCP001_0273
35970	SNP	A	G	4.0 %	CDS: MCCP001_0273
36010	SNP	C	T	4.0 %	CDS: MCCP001_0273
36162	SNP	G	A	84.0 %	CDS: MCCP001_0273
36169	SNP	G	A	4.0 %	CDS: MCCP001_0273
36323	SNP	C	T	4.0 %	CDS: MCCP001_0273
36428	SNP	T	C	36.0 %	CDS: MCCP001_0273
36433	SNP	G	A	12.0 %	CDS: MCCP001_0273
36435	SNP	A	T	8.0 %	CDS: MCCP001_0273
36589	SNP	G	A	4.0 %	CDS: MCCP001_0273
36934	SNP	C	T	4.0 %	CDS: MCCP001_0273
36992	SNP	G	A	4.0 %	CDS: MCCP001_0276-MCCP001_0277
37236	SNP	T	C	12.0 %	CDS: MCCP001_0276-MCCP001_0277
37516	SNP	G	A	4.0 %	CDS: MCCP001_0276-MCCP001_0277
38573	SNP	T	G	4.0 %	CDS: MCCP001_0279
38578	Indel	G	-	4.0 %	CDS: MCCP001_0279
38579	Indel	G	-	4.0 %	CDS: MCCP001_0279
38580	Indel	T	-	4.0 %	CDS: MCCP001_0279
38634	SNP	C	T	4.0 %	CDS: MCCP001_0279
38803	Indel	T	-	4.0 %	CDS: MCCP001_0279
38813	SNP	C	T	4.0 %	CDS: MCCP001_0279
38852	SNP	T	C	48.0 %	CDS: MCCP001_0279
39472	SNP	T	C	36.0 %	CDS: MCCP001_0279
39636	SNP	G	T	4.0 %	CDS: MCCP001_0279
39734	SNP	C	T	4.0 %	CDS: MCCP001_0279
40412	SNP	A	G	16.0 %	CDS: MCCP001_0280
41088	SNP	C	T	4.0 %	CDS: MCCP001_0282
42233	SNP	T	G	36.0 %	CDS: MCCP001_0305
42236	SNP	G	A	12.0 %	CDS: MCCP001_0305
42470	SNP	G	A	16.0 %	CDS: MCCP001_0305
42556	SNP	G	A	4.0 %	CDS: MCCP001_0305
42616	SNP	A	G	4.0 %	CDS: MCCP001_0305
43003	SNP	G	A	88.0 %	CDS: MCCP001_0305
43634	SNP	G	A	4.0 %	CDS: MCCP001_0305
44438	SNP	G	A	16.0 %	CDS: MCCP001_0305
44439	SNP	C	A	12.0 %	CDS: MCCP001_0305
44567	SNP	C	T	4.0 %	CDS: MCCP001_0305
44645	Homopolymer	-	A	4.0 %	CDS: MCCP001_0305
45104	SNP	A	G	68.0 %	CDS: MCCP001_0325
45250	SNP	C	T	12.0 %	CDS: MCCP001_0325
45686	SNP	T	C	12.0 %	CDS: MCCP001_0393
45933	SNP	G	A	12.0 %	CDS: MCCP001_0393
45967	SNP	C	T	4.0 %	CDS: MCCP001_0393
46052	SNP	C	T	36.0 %	CDS: MCCP001_0393
48890	SNP	A	G	4.0 %	CDS: MCCP001_0477
49397	SNP	A	G	36.0 %	CDS: MCCP001_0477
49782	SNP	G	A	4.0 %	CDS: MCCP001_0477
50099	SNP	G	A	52.0 %	CDS: MCCP001_0477
50180	SNP	A	G	4.0 %	CDS: MCCP001_0477
51573	SNP	G	T	16.0 %	CDS: MCCP001_0503
51898	SNP	C	T	4.0 %	CDS: MCCP001_0503
52376	SNP	T	C	4.0 %	CDS: MCCP001_0503
52449	SNP	T	C	68.0 %	CDS: MCCP001_0503
52553	SNP	C	T	4.0 %	CDS: MCCP001_0505
52803	SNP	G	A	4.0 %	CDS: MCCP001_0505
53408	SNP	A	G	36.0 %	CDS: MCCP001_0523
53910	SNP	A	G	36.0 %	CDS: MCCP001_0523
53919	SNP	G	A	52.0 %	CDS: MCCP001_0523
53944	SNP	G	A	72.0 %	CDS: MCCP001_0523
54227	SNP	T	C	16.0 %	CDS: MCCP001_0523
54452	SNP	G	T	52.0 %	CDS: MCCP001_0560
54475	SNP	C	T	4.0 %	CDS: MCCP001_0560
54528	SNP	G	T	20.0 %	CDS: MCCP001_0560
54675	SNP	C	T	4.0 %	CDS: MCCP001_0560
54698	Indel	-	A	12.0 %	CDS: MCCP001_0560
54712	Indel	-	T	20.0 %	CDS: MCCP001_0560
54713	Indel	-	A	20.0 %	CDS: MCCP001_0560
55054	SNP	C	T	4.0 %	CDS: MCCP001_0560
55086	SNP	C	T	12.0 %	CDS: MCCP001_0560
55089	SNP	C	T	4.0 %	CDS: MCCP001_0560
55152	SNP	T	G	4.0 %	CDS: MCCP001_0560
55393	SNP	T	C	12.0 %	CDS: MCCP001_0560
55542	SNP	T	C	84.0 %	CDS: MCCP001_0560
55791	SNP	G	A	4.0 %	CDS: MCCP001_0566
57548	SNP	C	T	12.0 %	CDS: MCCP001_0566
57648	SNP	G	A	20.0 %	CDS: MCCP001_0566
58406	SNP	A	G	16.0 %	CDS: MCCP001_0585
58448	SNP	T	C	52.0 %	CDS: MCCP001_0585
58488	SNP	C	T	20.0 %	CDS: MCCP001_0585
58895	SNP	G	A	4.0 %	CDS: MCCP001_0585
59112	SNP	G	A	12.0 %	CDS: MCCP001_0585
59129	SNP	T	C	4.0 %	CDS: MCCP001_0585
60322	SNP	G	A	16.0 %	CDS: MCCP001_0589
60534	SNP	G	A	36.0 %	CDS: MCCP001_0604
61535	SNP	C	T	12.0 %	CDS: MCCP001_0618
62696	SNP	A	G	12.0 %	CDS: MCCP001_0618
62839	SNP	G	G	20.0 %	CDS: MCCP001_0629
63149	SNP	T	C	12.0 %	CDS: MCCP001_0643
63152	SNP	T	C	4.0 %	CDS: MCCP001_0643
64011	SNP	C	G	4.0 %	CDS: MCCP001_0643
65276	SNP	T	C	4.0 %	CDS: MCCP001_0762
65429	SNP	T	C	4.0 %	CDS: MCCP001_0762
65863	SNP	T	C	20.0 %	CDS: MCCP001_0762
65939	SNP	T	C	20.0 %	CDS: MCCP001_0762
66060	SNP	G	A	4.0 %	CDS: MCCP001_0780
66422	SNP	A	G	4.0 %	CDS: MCCP001_0780
66565	SNP	C	T	4.0 %	CDS: MCCP001_0785
66752	SNP	C	T	4.0 %	CDS: MCCP001_0785
67187	SNP	A	G	20.0 %	CDS: MCCP001_0791
67219	SNP	T	C	4.0 %	CDS: MCCP001_0791
67374	SNP	A	G	4.0 %	CDS: MCCP001_0791
67727	SNP	T	C	36.0 %	CDS: MCCP001_0807
68885	SNP	G	A	36.0 %	CDS: MCCP001_0854
69131	SNP	G	A	52.0 %	CDS: MCCP001_0854
69607	SNP	A	G	4.0 %	CDS: MCCP001_0855
69824	SNP	A	G	16.0 %	CDS: MCCP001_0855
70650	SNP	C	T	4.0 %	CDS: MCCP001_0855
70664	SNP	A	G	12.0 %	CDS: MCCP001_0855
70771	SNP	G	A	12.0 %	CDS: MCCP001_0855
71402	SNP	T	C	4.0 %	CDS: MCCP001_0875
71948	SNP	G	A	20.0 %	CDS: MCCP001_0875
72578	SNP	T	C	4.0 %	CDS: MCCP001_0875
73914	SNP	C	T	4.0 %	CDS: MCCP001_0878-MCCP001_0879
74204	SNP	G	A	16.0 %	CDS: MCCP001_0878-MCCP001_0879
74303	SNP	G	A	4.0 %	CDS: MCCP001_0878-MCCP001_0879
74400	SNP	C	T	4.0 %	CDS: MCCP001_0878-MCCP001_0879
74561	Indel	A	-	4.0 %	CDS: MCCP001_0878-MCCP001_0879
74562	Indel	A	-	4.0 %	CDS: MCCP001_0878-MCCP001_0879
74662	Homopolymer	-	A	36.0 %	CDS: MCCP001_0878-MCCP001_0879
74766	SNP	G	A	16.0 %	CDS: MCCP001_0942-MCCP001_0943
74975	SNP	A	G	8.0 %	CDS: MCCP001_0942-MCCP001_0943
75303	SNP	C	T	4.0 %	CDS: MCCP001_0942-MCCP001_0943
75398	SNP	G	A	4.0 %	CDS: MCCP001_0942-MCCP001_0943
75429	SNP	G	A	68.0 %	CDS: MCCP001_0942-MCCP001_0943
75524	Indel	G	-	4.0 %	CDS: MCCP001_0942-MCCP001_0943
75726	Homopolymer	-	A	4.0 %	CDS: MCCP001_0942-MCCP001_0943
75827	SNP	T	C	4.0 %	CDS: MCCP001_0942-MCCP001_0943
75900	Homopolymer	A	-	0.16	CDS: MCCP001_0942-MCCP001_0943
75901	Homopolymer	A	-	0.68	CDS: MCCP001_0942-MCCP001_0943
75929	SNP	A	G	4.0 %	CDS: MCCP001_0942-MCCP001_0943
76162	SNP	C	T	4.0 %	CDS: MCCP001_0942-MCCP001_0943
76404	SNP	G	A	4.0 %	CDS: MCCP001_0942-MCCP001_0943
76481	Indel	T	-	12.0 %	CDS: MCCP001_0942-MCCP001_0943
76759	SNP	G	A	16.0 %	CDS: MCCP001_0942-MCCP001_0943
77335	SNP	G	A	36.0 %	CDS: MCCP001_0972-MCCP001_0973-MCCP001_0974
77378	SNP	A	G	4.0 %	CDS: MCCP001_0972-MCCP001_0973-MCCP001_0974
77406	SNP	G	A	20.0 %	CDS: MCCP001_0972-MCCP001_0973-MCCP001_0974
77524	SNP	G	A	52.0 %	CDS: MCCP001_0972-MCCP001_0973-MCCP001_0974
77543	Homopolymer	-	A	36.0 %	CDS: MCCP001_0972-MCCP001_0973-MCCP001_0974
77571	Homopolymer	A	-	4.0 %	CDS: MCCP001_0972-MCCP001_0973-MCCP001_0974
77595	SNP	A	G	52.0 %	CDS: MCCP001_0972-MCCP001_0973-MCCP001_0974
77639	SNP	A	G	4.0 %	CDS: MCCP001_0972-MCCP001_0973-MCCP001_0974
77781	SNP	C	T	4.0 %	CDS: MCCP001_0972-MCCP001_0973-MCCP001_0974
77830	SNP	G	A	36.0 %	CDS: MCCP001_0972-MCCP001_0973-MCCP001_0974
77863	SNP	C	T	12.0 %	CDS: MCCP001_0972-MCCP001_0973-MCCP001_0974
* According to the genome sequence of strain 9231-Abomsa [GenbaNK:LM995445]
