# Supplementary material for: A large-scale genomic approach affords unprecedented resolution for the molecular epidemiology and evolutionary history of contagious caprine pleuropneumonia
Source: Springer Nature journal article supplement (doi:10.1186/s13567-015-0208-x), 2015-07-06

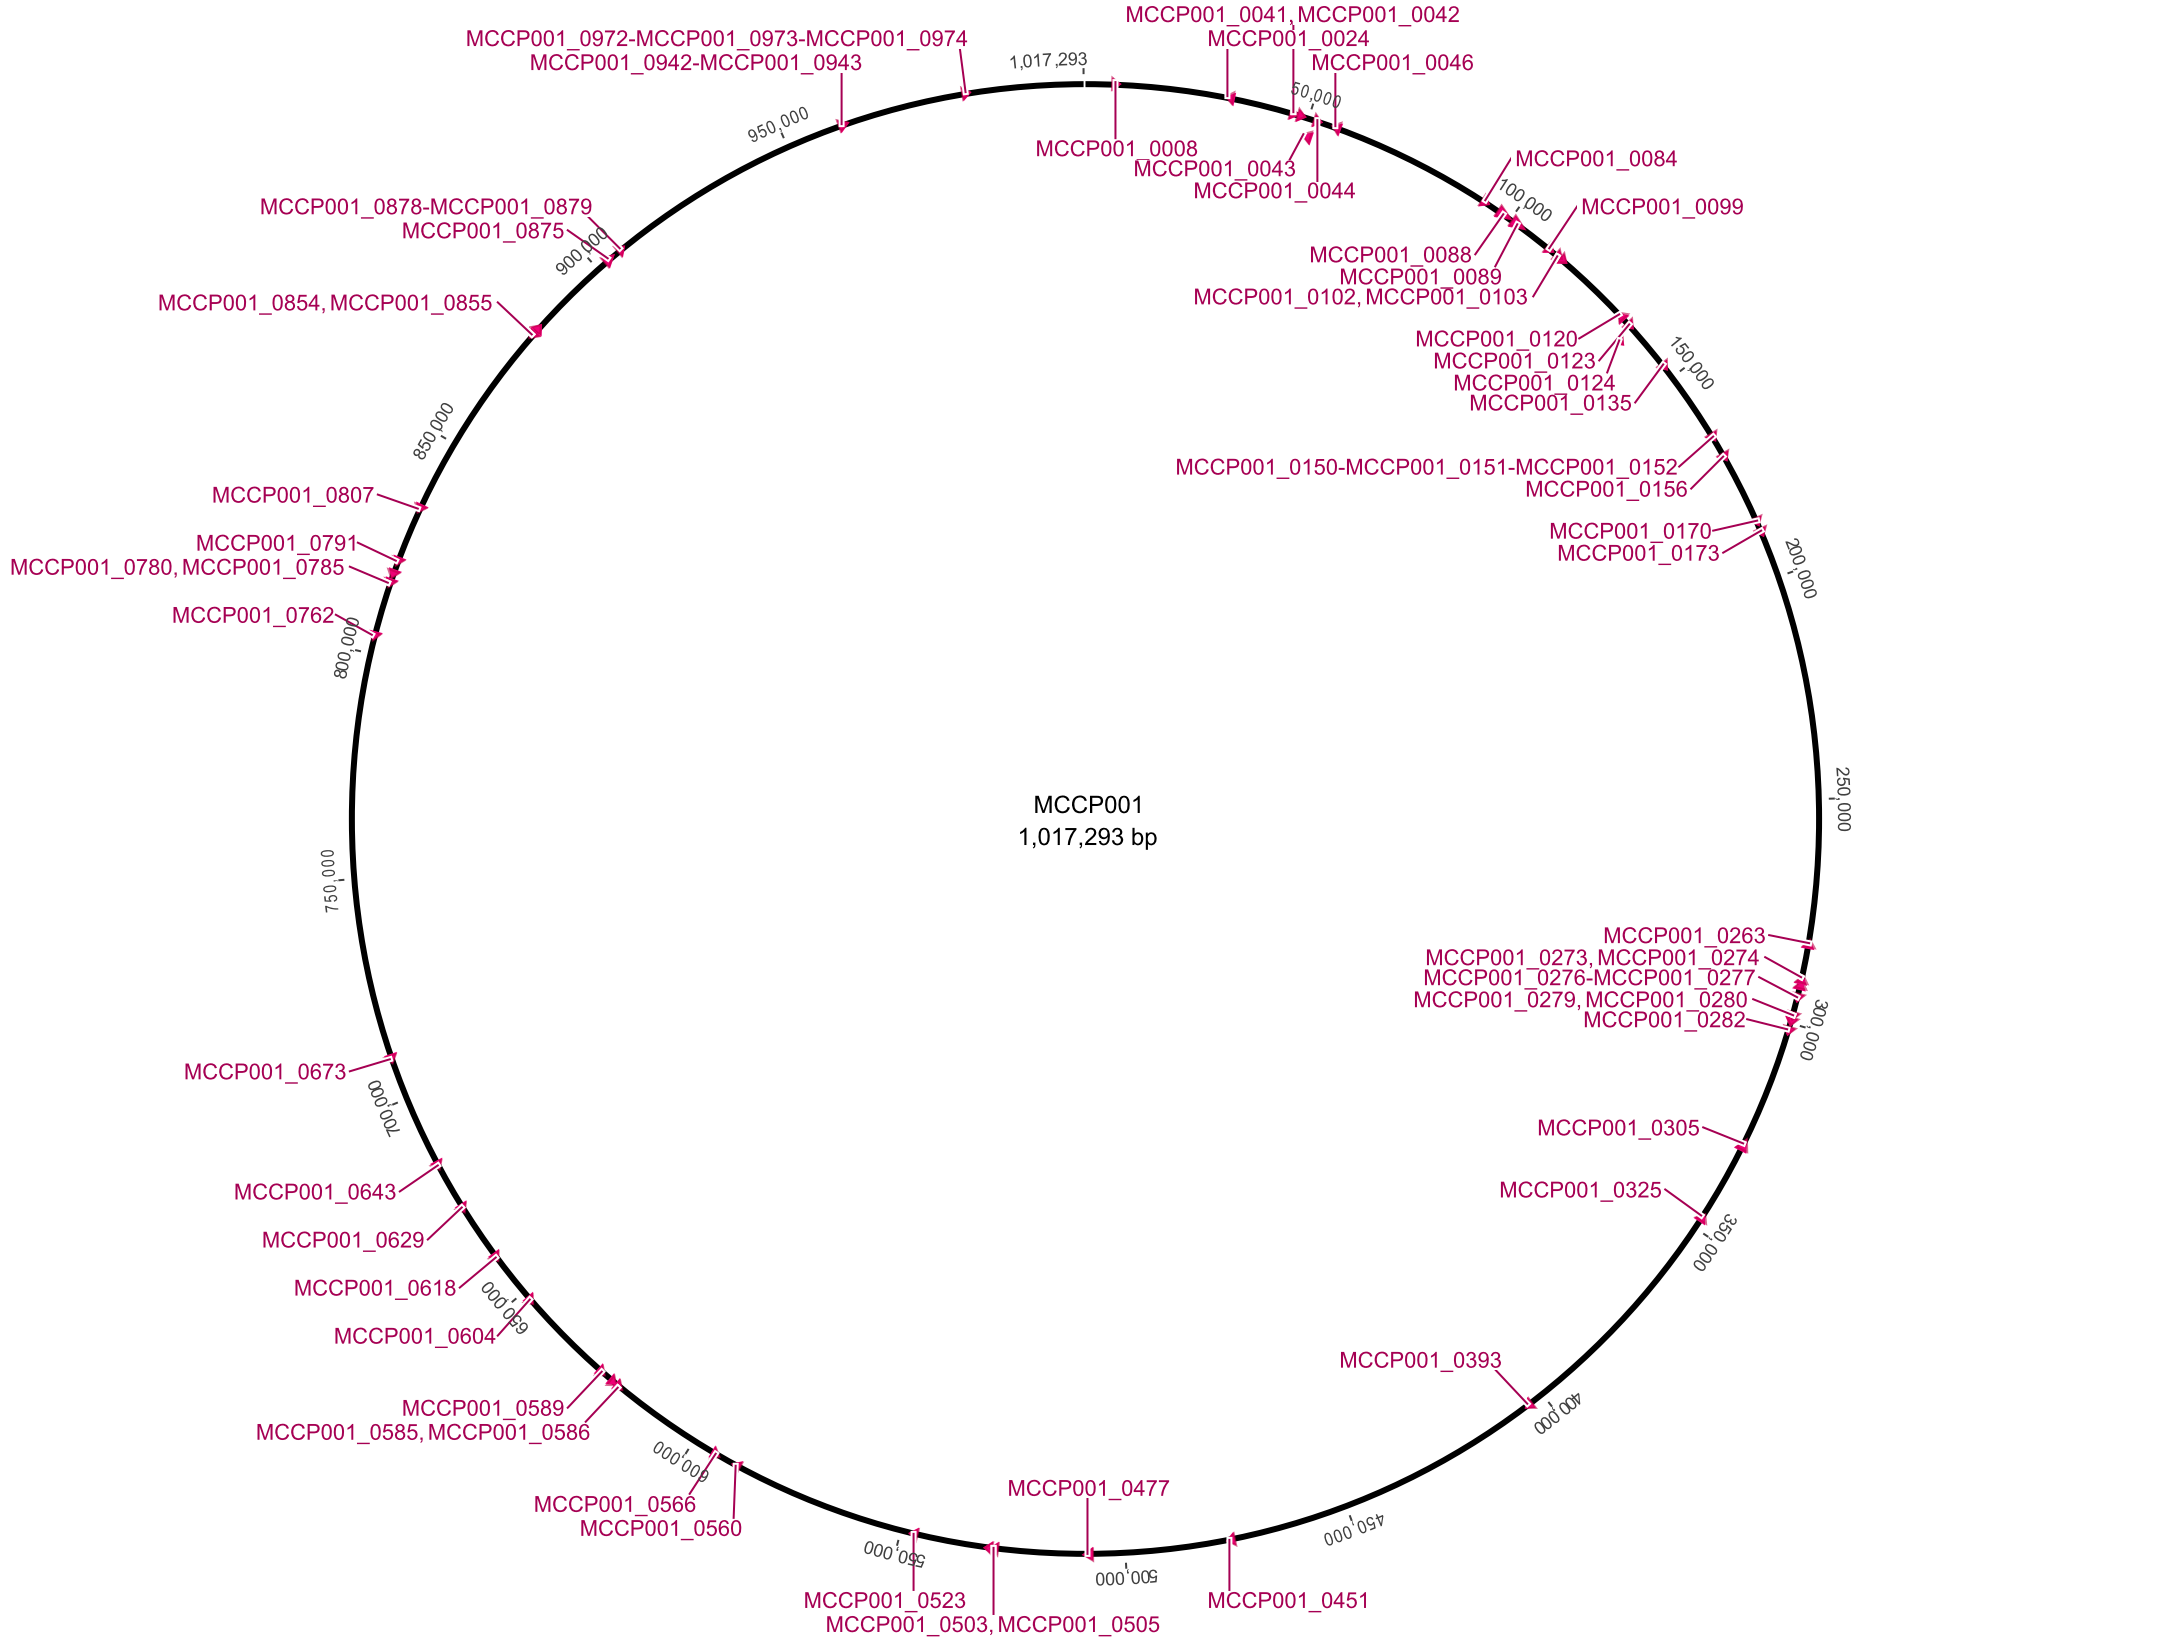

Supplement: MOESM2 [file 13567_2015_208_MOESM2_ESM.pdf]
